# Supplementary material for: A dysprosium(iii)-based triple helical-like complex as a turn-on/off fluorescence sensor for Al(iii) and 4,5-dimethyl-2-nitroaniline
Source: Royal Society of Chemistry journal article supplement (doi:10.1039/d3dt03546h), 2024-01-01
Supplement: d3dt03546h1.pdf [file d3dt03546h1.pdf]

## Supporting Information

### **A dysprosium(III)-based triple helical-like complex as a turn-on/off fluorescence sensor for Al(III) and 4,5-dimethyl-2-nitroaniline**

Yi Yin<sup>a</sup>, Rong Luo<sup>a</sup>, Wen Wang<sup>a</sup>, Rui Wang<sup>a</sup>, Nan Jiang<sup>a</sup>, Peng Chen<sup>a</sup>, Hai-Jun Yu<sup>a</sup>,  
Shuang-Yu Bi<sup>b</sup>, Feng Shao<sup>\*a</sup>

<sup>a</sup> Key Laboratory of Marine Chemistry Theory and Technology, Ministry of Education, College of Chemistry and Chemical Engineering, Ocean University of China, Qingdao 266100, China

<sup>b</sup> State Key Laboratory of Microbial Technology, Shandong University, Qingdao 266237, China

## **1 Experimental section**

The <sup>1</sup>H NMR and FTIR of malondihydrazide and H<sub>4</sub>L were shown in Figure S1, S2.

### **1.1 Synthesis of malondihydrazide**

To the dimethyl malonate (4.30 mL, 37.60 mmol) in absolute EtOH (5 mL) was added hydrazine hydrate (7.29 mL, 150 mmol), and the solution refluxed for 10 h. The resulting white dihydrazide was filtered, given a cursory wash with ethanol, and then dried in vacuo. Yield: 47.20% (2.34 g) (based on dimethyl malonate). <sup>1</sup>H NMR (400 MHz, DMSO-*d*<sub>6</sub>) δ 9.07 (s, 2H), 4.25 (s, 4H), 2.90 (s, 2H).

### **1.2 Synthesis of Schiff base ligand H<sub>4</sub>L**

3-ethoxysalicylaldehyde (0.83 g, 5 mmol) and a small amount of glacial acetic acid were added into the suspension of malonate (0.33 g, 2.5 mmol) in MeOH (20 mL), reflux for 6 h. The white precipitate of the desired dihydrazone was collected and washed with ethanol prior to drying in vacuo. Yield: 93.64% (1.00 g) (based on malondihydrazide). <sup>1</sup>H NMR (400 MHz, DMSO-*d*<sub>6</sub>) δ 11.98 – 11.33 (m, 2H), 8.45 –

8.28 (m, 2H), 7.17 (dd,  $J = 35.4, 7.6$  Hz, 2H), 6.95 (dd,  $J = 31.1, 6.0$  Hz, 2H), 6.85 – 6.61 (m, 2H), 4.03 (td,  $J = 7.5, 7.0, 3.0$  Hz, 4H), 3.34 (d,  $J = 13.8$  Hz, 2H), 1.33 (tt,  $J = 6.8, 3.3$  Hz, 6H).

### **1.3 Photoluminescence (PL) experiments**

#### **1.3.1 Photoluminescence spectrum**

**1@EtOH** was prepared as a 10  $\mu$ M solution, the test conditions were as follows: excitation wavelength 365 nm, slit width 5-10 nm, scanning range 400-700 nm.

#### **1.3.2 PL lifetime kinetic**

The light pulse was switched on at the 5th second and switched off at the 10th second, and the phosphorescence spectrum lifetime kinetic was collected over a period of 0-30 seconds.

### **1.4 The recycling experiments**

#### **For detecting $Al^{3+}$ :**

The complex **1** detecting  $Al^{3+}$  is not reversible due to their coordination reaction, which confirmed by MS-ESI.

#### **For detecting DMNA:**

(1) The complex **1** (10 mg) was dissolved in 10 mL ethanol, and the fluorescence spectrum was collected after ultrasound for 10 min.

(2) 1 mL DMNA ( $10^{-2}$  M) was added to the solution above, and fluorescence spectrum was recorded.

(3) Then the solvent (ethanol) was removed via rotavapor, and 1 mL ether was added and ultrasounded for 10 min (repeat 3 times) to remove the DMNA, the first cycling complex **1** was obtained by filtration and dried.

The second and third cycling complex **1** were obtained by repeating the procedures above for two and three times, respectively.

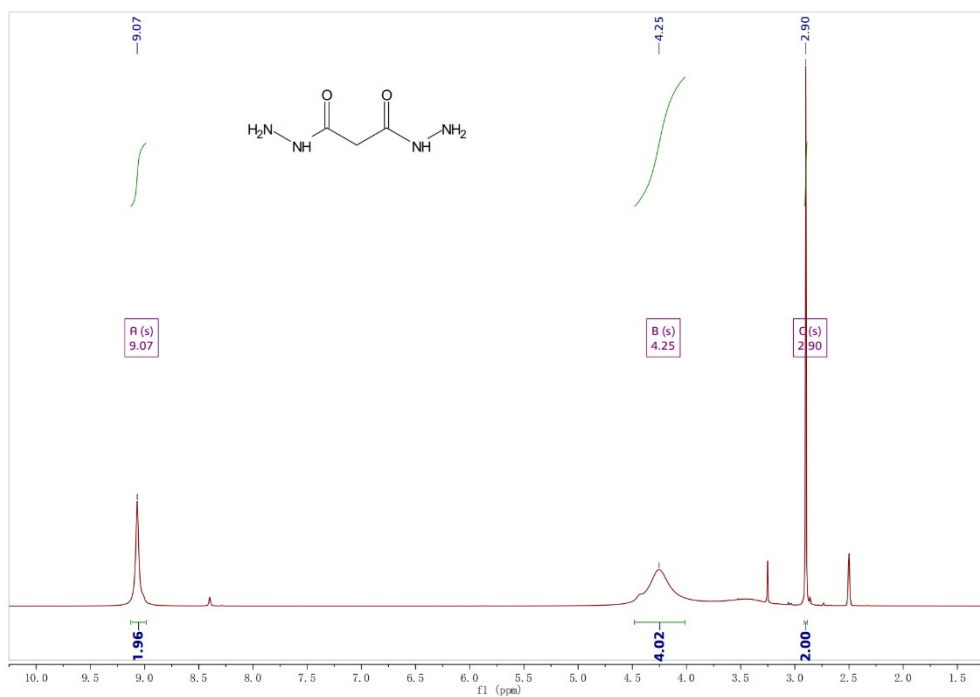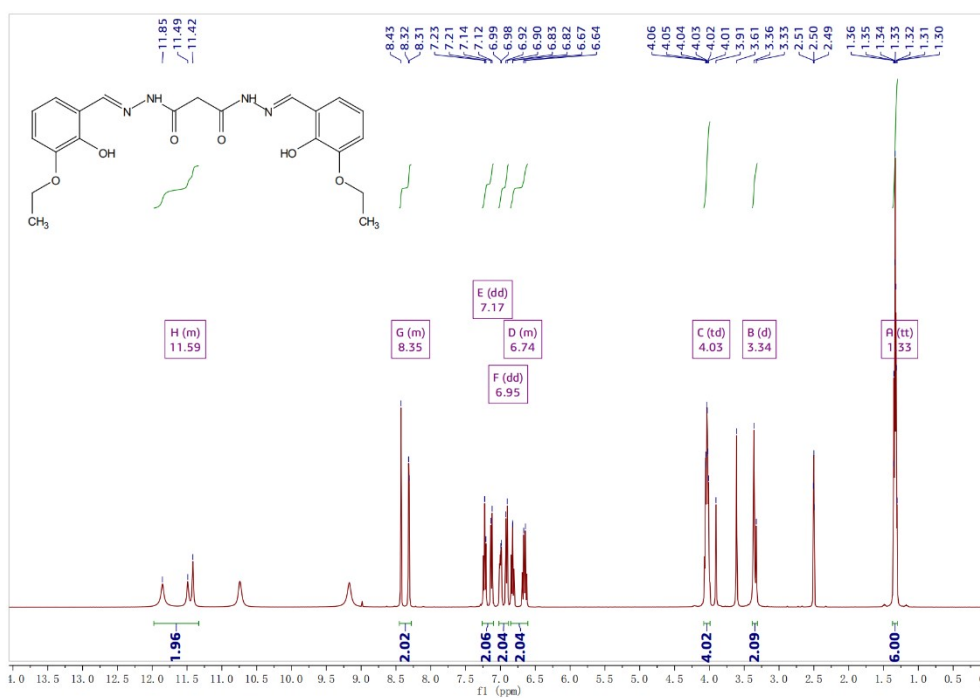

**Figure S1** <sup>1</sup>H NMR of malondihydrazide (top) and H<sub>4</sub>L (bottom).

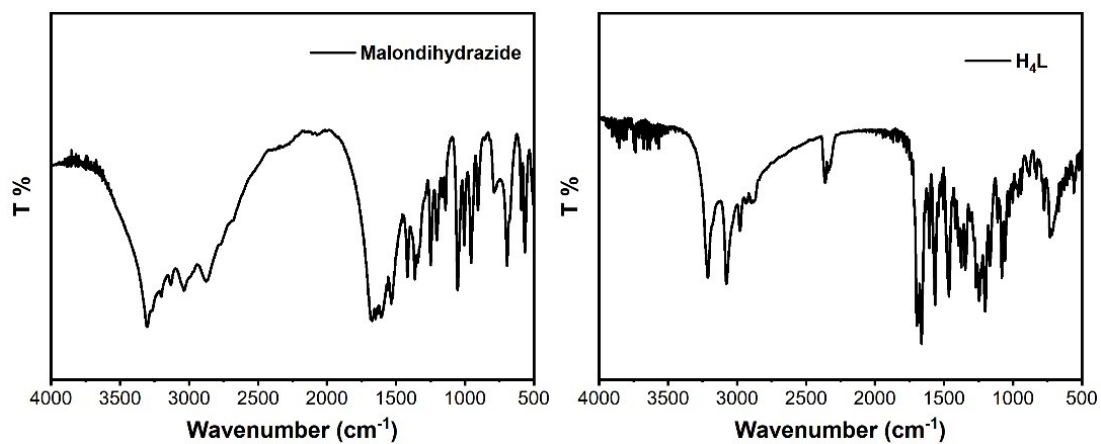

**Figure S2** FTIR of malondihydrazide (left) and H<sub>4</sub>L (right).

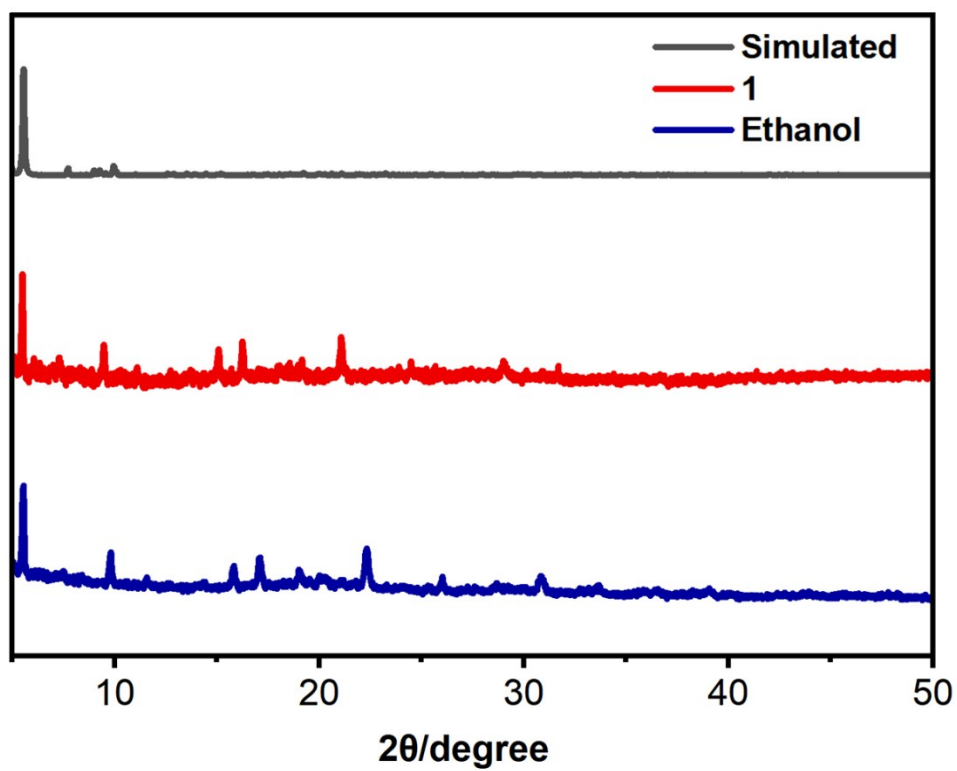

**Figure S3** The powder X-ray diffraction patterns of 1.

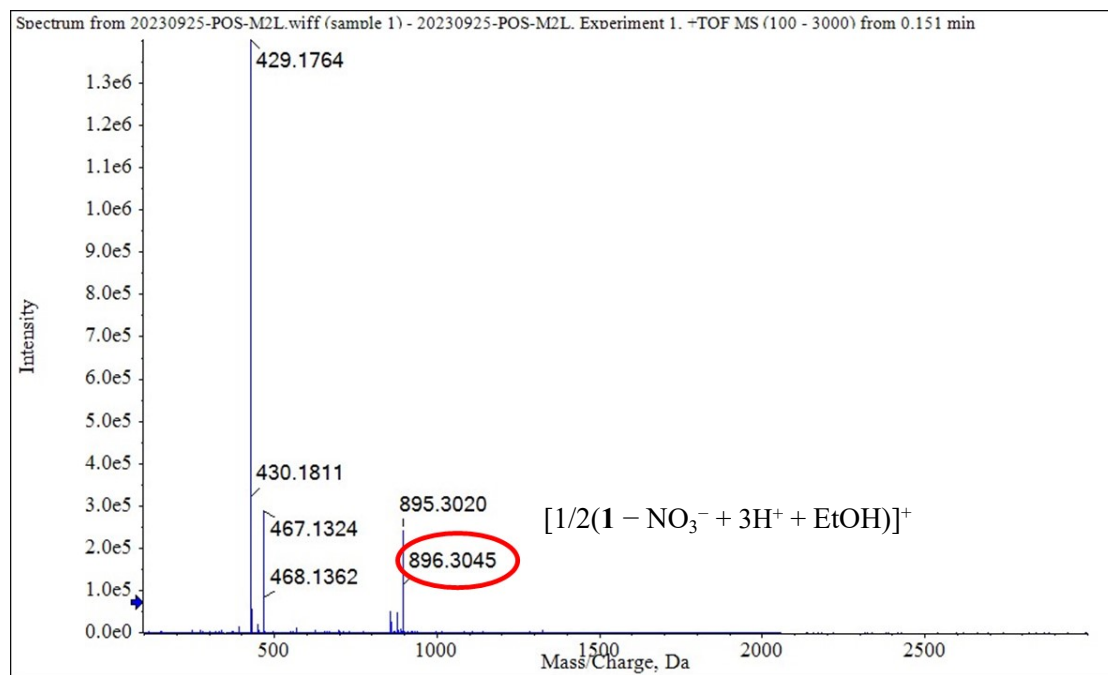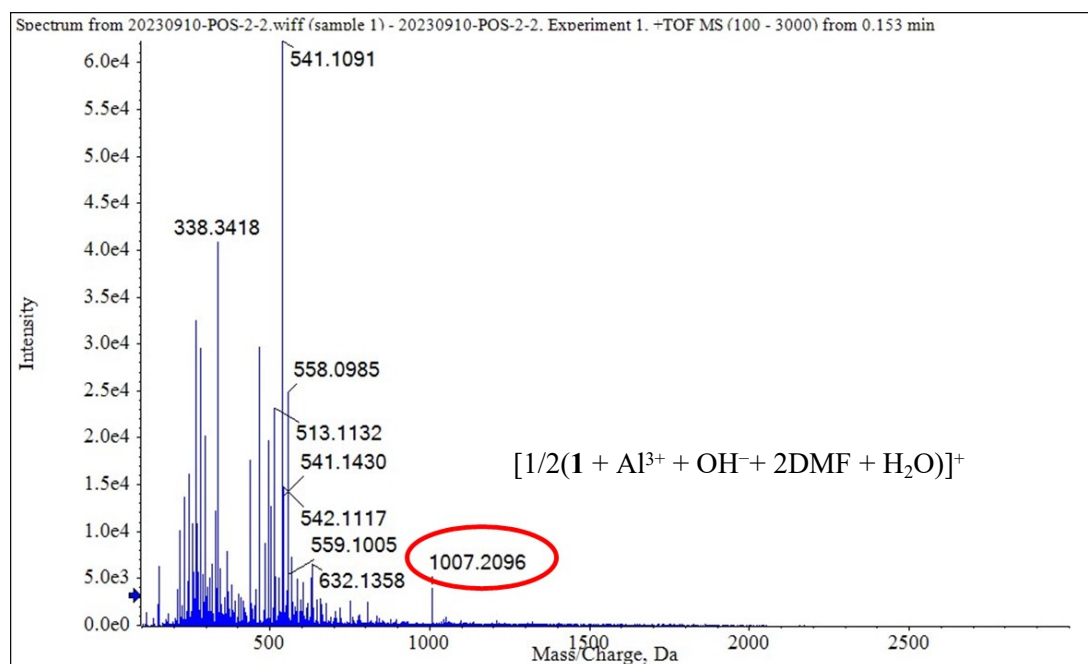

**Figure S4** Mass spectrum of **1** (top,) and  $[\mathbf{1} + \text{Al}^{3+}]$  complex (bottom).

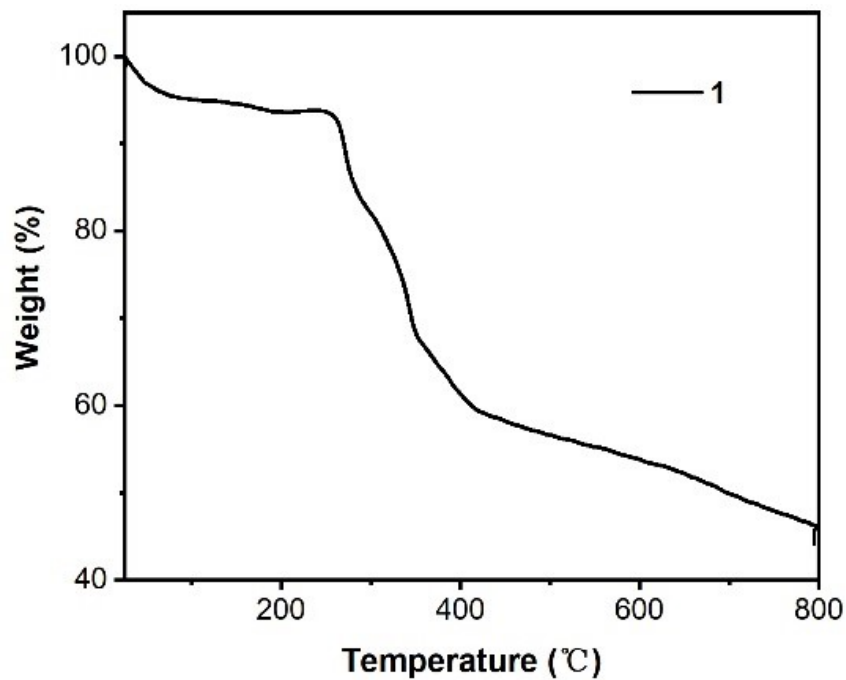

Figure S5 Thermogravimetric analysis (TGA) curve of 1.

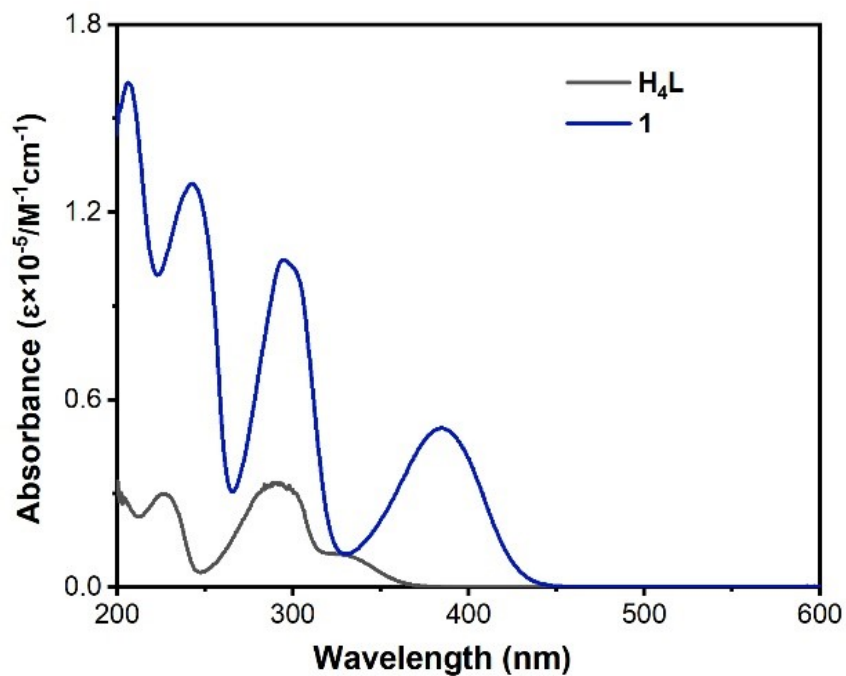

Figure S6 UV-Vis spectra of H<sub>4</sub>L, 1@EtOH.

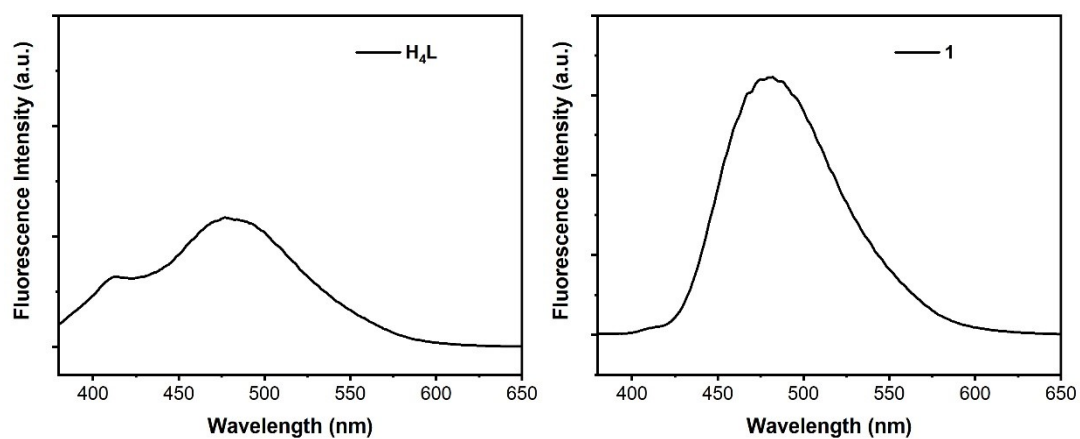

**Figure S7** The emission spectra of H<sub>4</sub>L and **1** in solid state at room temperature.

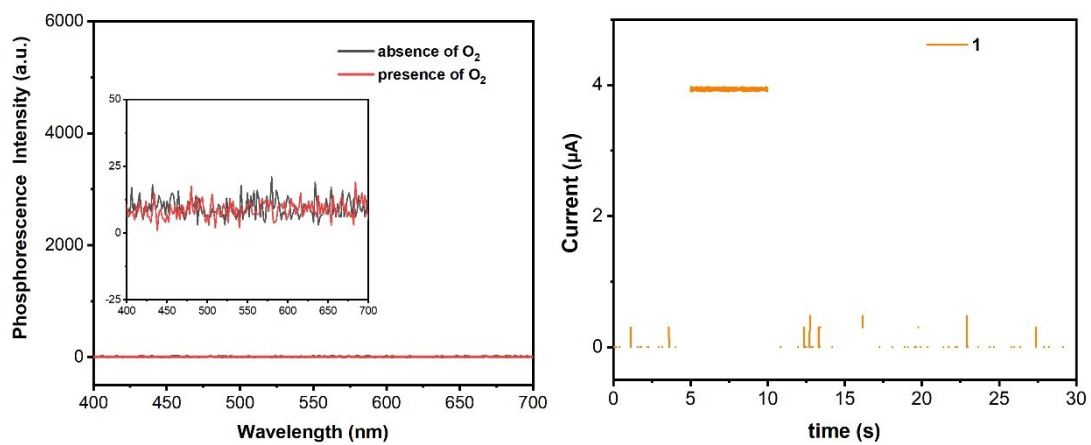

**Figure S8** The PL spectra of **1@EtOH** in the presence and absence of O<sub>2</sub> (left) and the PL lifetime kinetic of **1@EtOH** in the absence of O<sub>2</sub> (right).

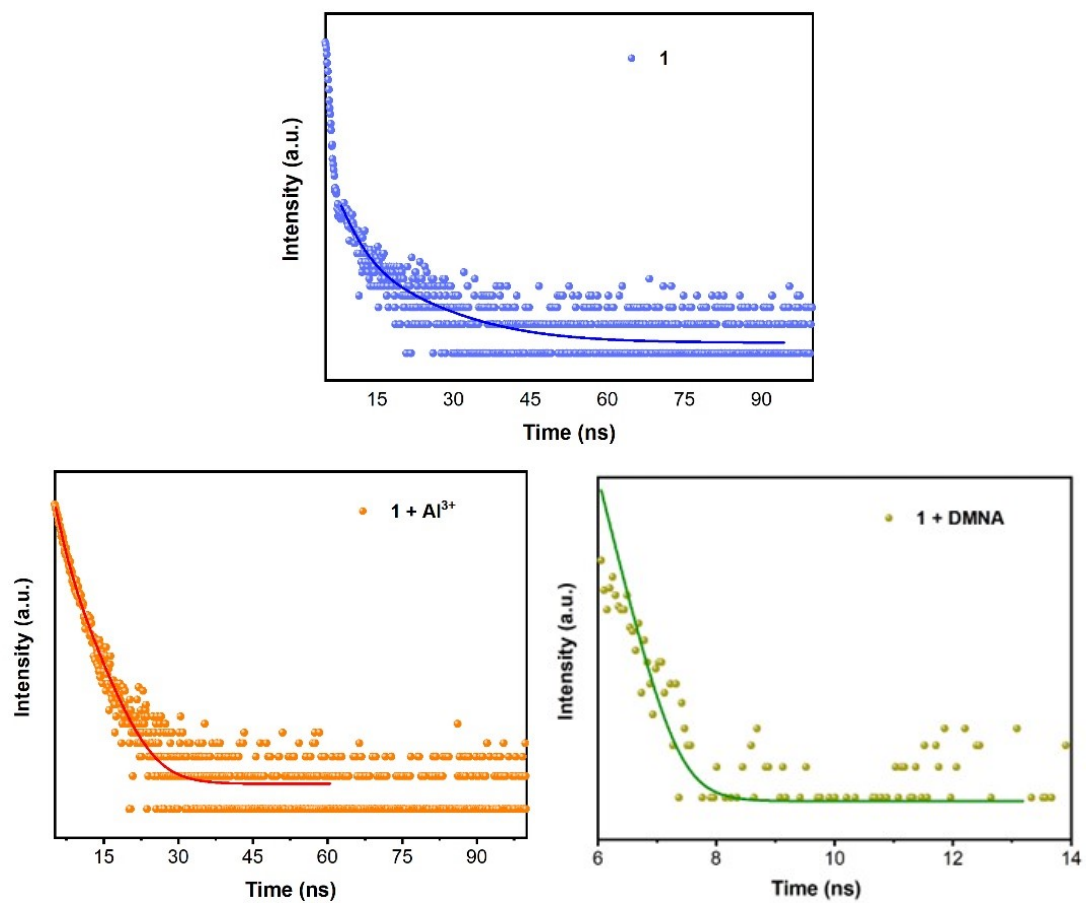

**Figure S9** The time resolved luminescence decay corresponding fitted lines of **1@EtOH** (1.45 ns), **[1+Al<sup>3+</sup>]** (2.99 ns) and **[1+DMNA]** (0.34 ns).



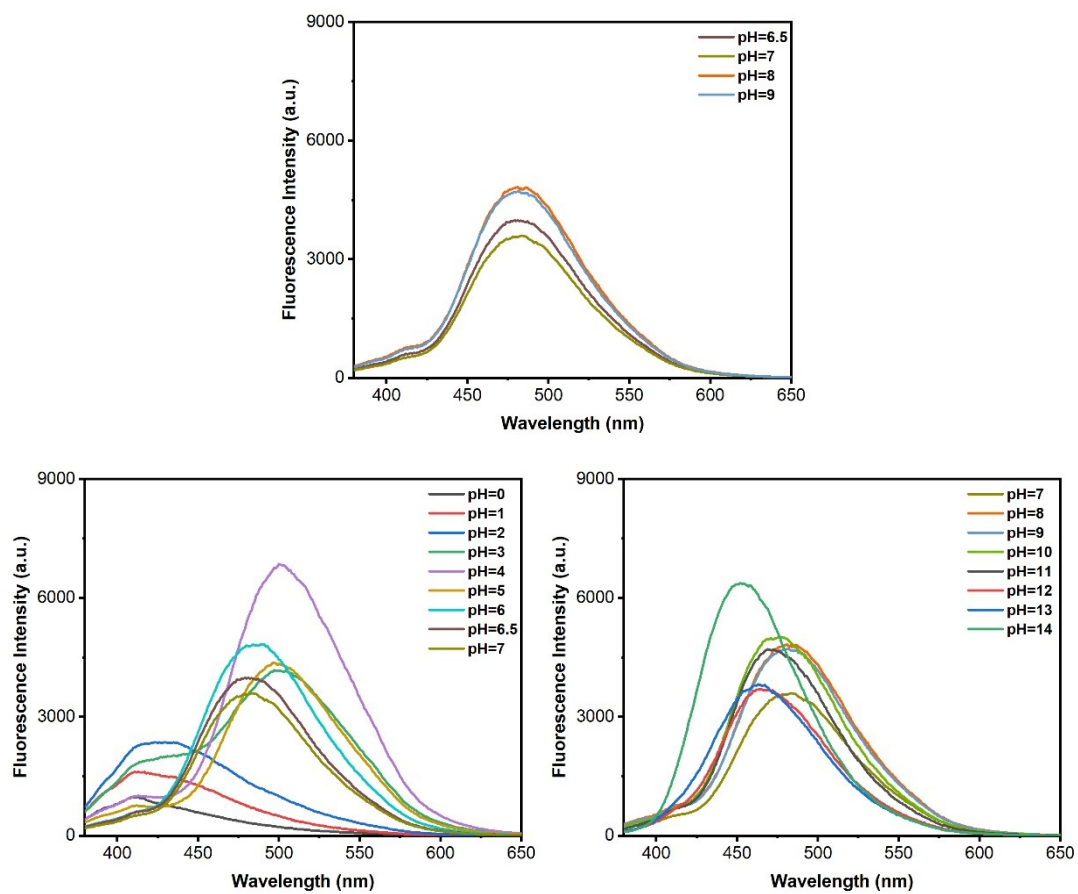

**Figure S10** Fluorescence intensity of 1@EtOH ( $10^{-5}$  mol L $^{-1}$ ) at different pH.

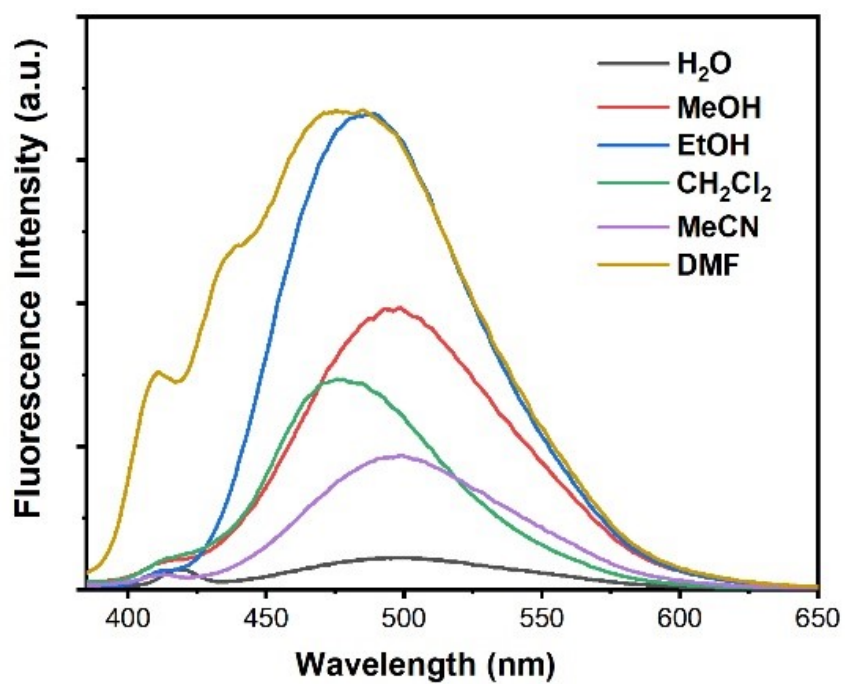

**Figure S11** Fluorescence spectra of **1** in different solvents.

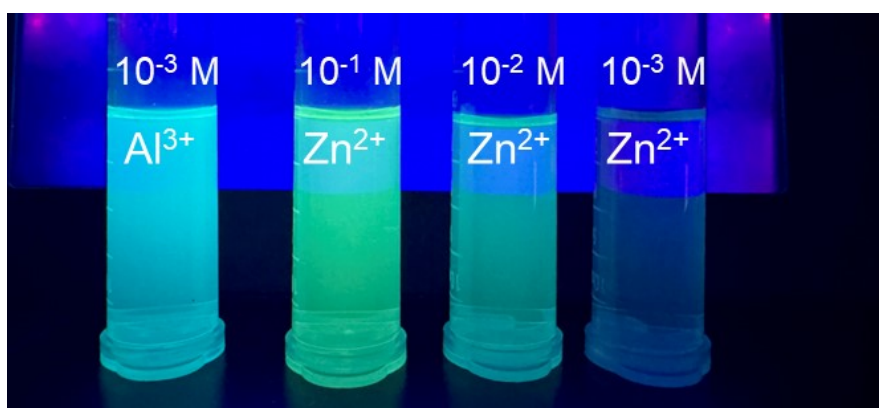

**Figure S12** Photograph of fluorescent solutions under 365 nm UV light.

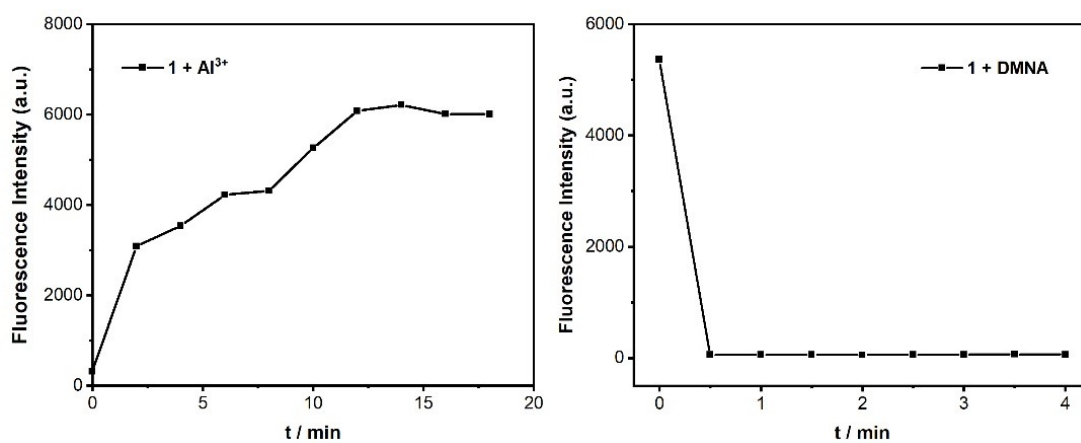

**Figure S13** Time response of [1+Al<sup>3+</sup>] and [1+DMNA].

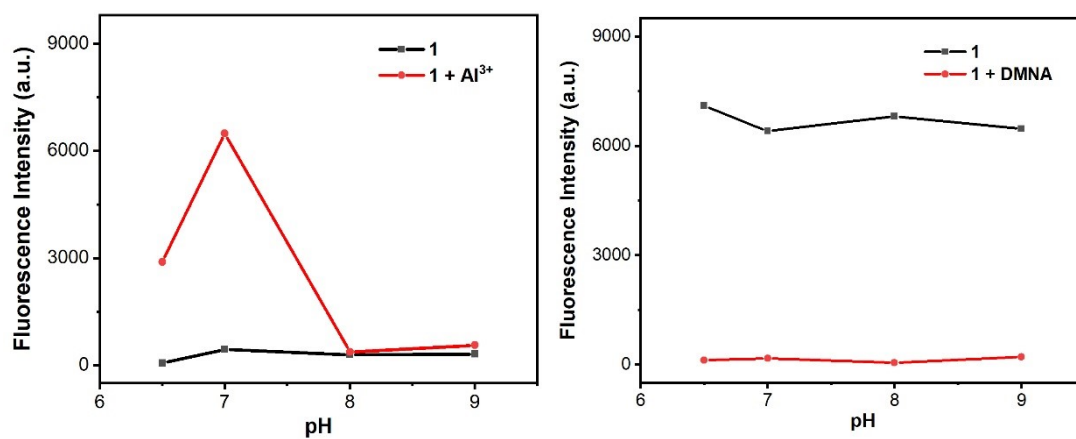

**Figure S14** pH response of [1+Al<sup>3+</sup>] and [1+DMNA].

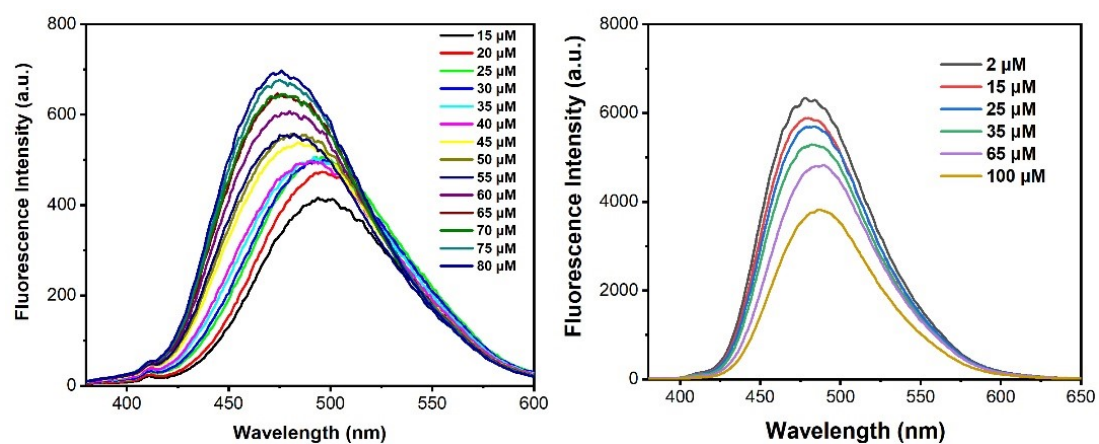

**Figure S15** The emission spectra of 1@EtOH after adding different concentrations of Al<sup>3+</sup> and DMNA.

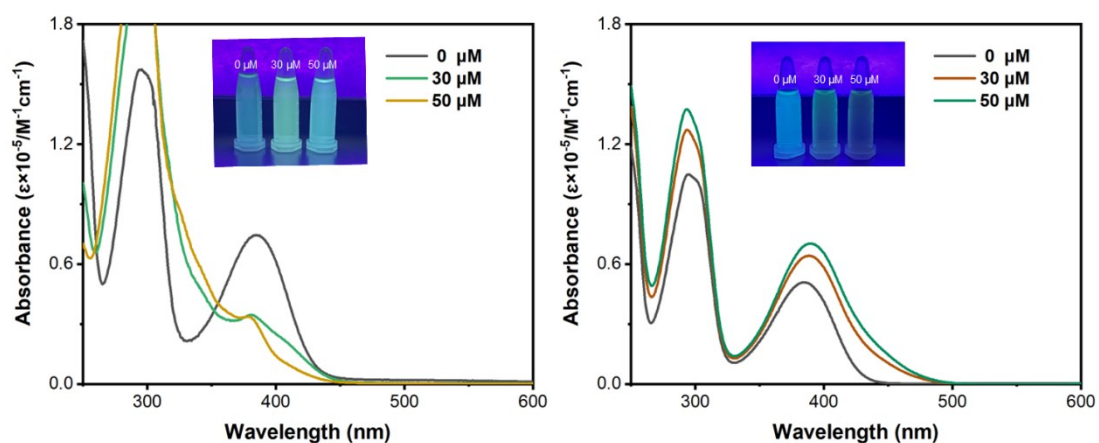

**Figure S16** The UV spectra of **1@EtOH** after adding different concentrations of  $\text{Al}^{3+}$  (left) and DMNA (right).

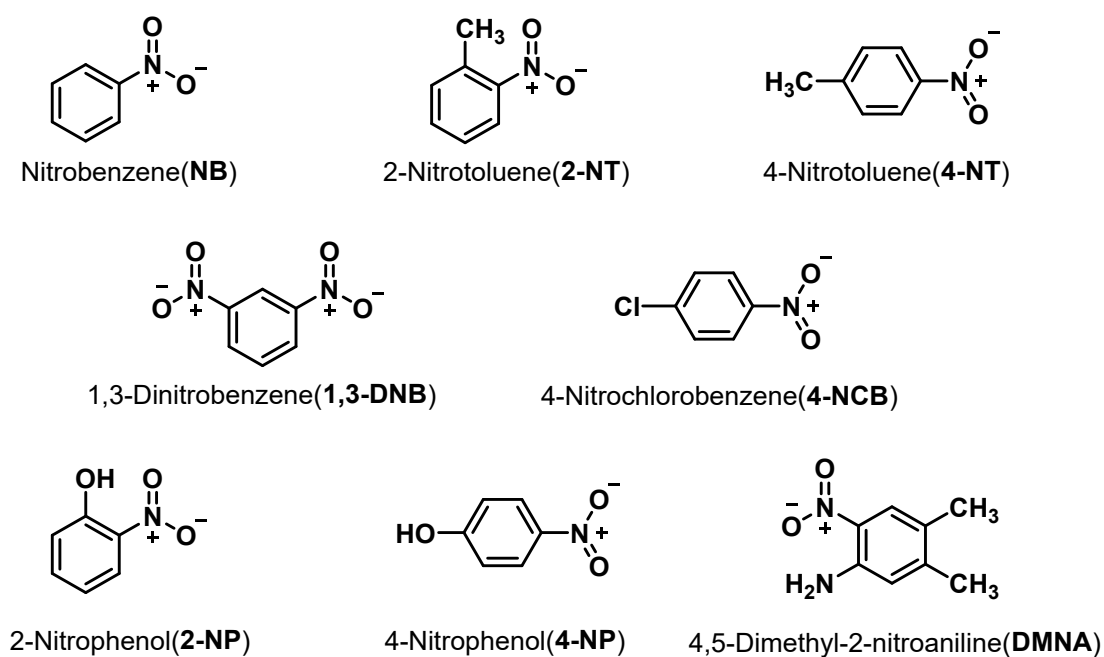

**Figure S17** Chemical structures of NACs.

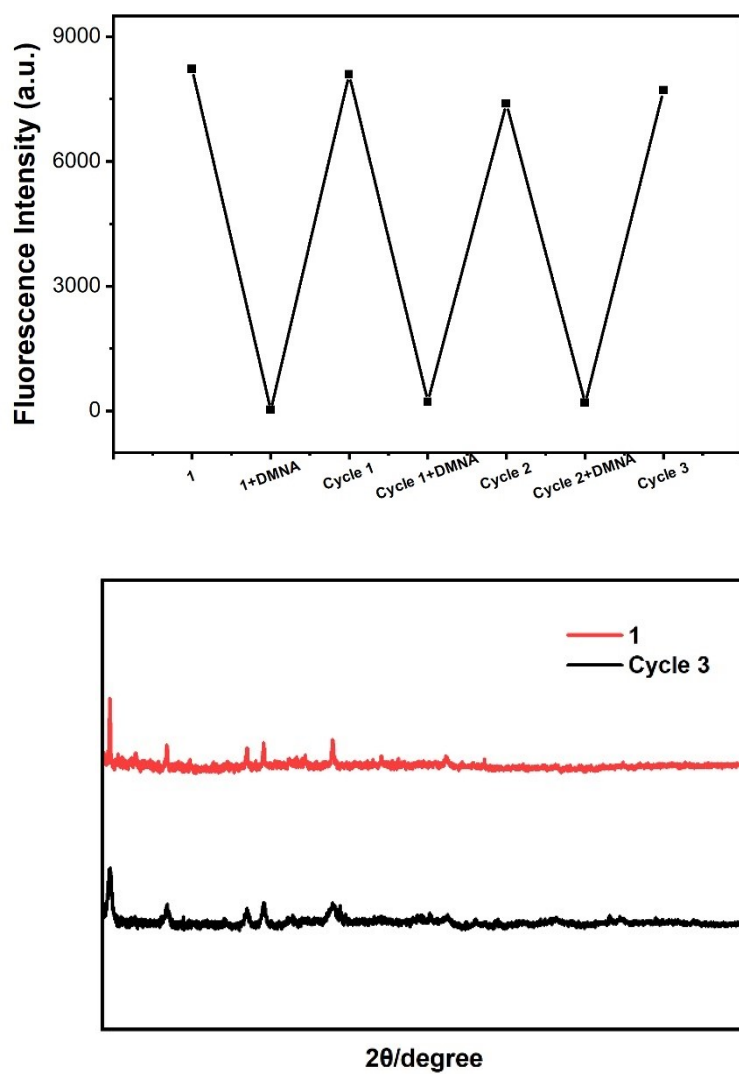

**Figure S18** Changes in reversible fluorescence intensity during the cycle (top), PXRD data of the recovered recycled materials and compare with **1** (bottom).

**Table S1** Selected bond lengths (Å) for **1**.

| Selected bonds | Bond lengths (Å) |
|----------------|------------------|
| Dy1—O2         | 2.379(5)         |
| Dy1—O4         | 2.431(5)         |
| Dy1—O5         | 2.573(5)         |
| Dy1—O6         | 2.563(5)         |
| Dy1—O7         | 2.564(5)         |
| Dy1—O8         | 2.392(5)         |
| Dy1—N1         | 2.757(6)         |
| Dy1—N4         | 2.782(6)         |
| Dy1—N6         | 2.768(7)         |
| Dy2—O10        | 2.596(5)         |
| Dy2—O11        | 2.571(5)         |
| Dy2—O12        | 2.566(5)         |
| Dy2—O13        | 2.367(5)         |
| Dy2—O14        | 2.389(5)         |
| Dy2—O15        | 2.393(5)         |
| Dy2—N8         | 2.768(6)         |
| Dy2—N10        | 2.797(7)         |
| Dy2—N12        | 2.762(6)         |
| O3—K1          | 2.851(6)         |
| O4—K1          | 2.864(6)         |
| O15—K2         | 2.881(5)         |
| O16—K2         | 2.836(6)         |

**Table S2** Selected bond angles (°) for **1**.

| Bond angles (°) |            | Bond angles (°) |            |
|-----------------|------------|-----------------|------------|
| O2—Dy1—O4       | 78.73(18)  | O13—Dy2—N10     | 63.82(18)  |
| O2—Dy1—O5       | 92.57(18)  | O13—Dy2—N12     | 141.21(17) |
| O2—Dy1—O6       | 124.13(17) | N8—Dy2—N10      | 113.08(18) |
| O2—Dy1—O7       | 148.56(17) | N12—Dy2—N8      | 118.40(19) |
| O2—Dy1—O8       | 81.57(19)  | N12—Dy2—N10     | 123.59(18) |
| O2—Dy1—N1       | 78.80(19)  | O2—K1—O1        | 52.30(15)  |
| O2—Dy1—N4       | 64.67(17)  | O2—K1—O3        | 117.78(17) |
| O2—Dy1—N6       | 145.74(19) | O2—K1—O4        | 65.57(16)  |
| O5—Dy1—N1       | 59.94(17)  | O2—K1—O9        | 99.5(2)    |
| O5—Dy1—N4       | 72.87(17)  | O3—K1—O1        | 109.88(17) |
| O5—Dy1—N6       | 119.71(17) | O3—K1—O4        | 54.43(15)  |
| N1—Dy1—N4       | 117.83(19) | O3—K1—O9        | 122.8(2)   |
| N1—Dy1—N6       | 125.73(19) | O9—K1—O1        | 127.3(2)   |
| N6—Dy1—N4       | 111.58(18) | O13—K2—O14      | 65.69(15)  |
| O10—Dy2—N8      | 59.64(18)  | O13—K2—O15      | 64.08(16)  |
| O10—Dy2—N10     | 63.14(17)  | O13—K2—O16      | 118.78(18) |
| O10—Dy2—N12     | 129.20(16) | O13—K2—O17      | 97.05(18)  |
| O13—Dy2—O10     | 89.15(16)  | O13—K2—O18      | 120.01(17) |
| O13—Dy2—O11     | 153.19(17) | O13—K2—O20      | 156.10(19) |
| O13—Dy2—O12     | 122.74(19) | O16—K2—O15      | 57.44(15)  |
| O13—Dy2—O14     | 78.21(17)  | O16—K2—O17      | 124.82(18) |
| O13—Dy2—O15     | 77.35(18)  | O16—K2—O20      | 84.21(18)  |
| O13—Dy2—N8      | 83.41(18)  | O17—K2—O20      | 72.01(18)  |

**Table S3** SHAPE analysis of eight-coordinated and nine-coordinated geometry for **1**.

| Label Symmetry         | Dy     | Label Symmetry         | K      |
|------------------------|--------|------------------------|--------|
| EP D <sub>9h</sub>     | 34.675 | OP D <sub>8h</sub>     | 41.387 |
| OPY C <sub>8v</sub>    | 23.23  | HPY C <sub>7v</sub>    | 31.723 |
| HBPY D <sub>7h</sub>   | 17.626 | HBPY D <sub>6h</sub>   | 31.317 |
| JTC C <sub>3v</sub>    | 11.935 | CU O <sub>h</sub>      | 31.655 |
| JCCU C <sub>4v</sub>   | 9.337  | SAPR D <sub>4d</sub>   | 32.244 |
| CCU C <sub>4v</sub>    | 8.619  | TDD D <sub>2d</sub>    | 30.617 |
| JCSAPR C <sub>4v</sub> | 2.945  | JGBF D <sub>2d</sub>   | 26.74  |
| CSAPR C <sub>4v</sub>  | 2.584  | JETBPY D <sub>3h</sub> | 31.475 |
| JTCTPR D <sub>3h</sub> | 2.382  | TBTPR C <sub>2v</sub>  | 29.298 |
| TCTPR D <sub>3h</sub>  | 2.083  | BTPR C <sub>2v</sub>   | 30.295 |
| JTDIC C <sub>3v</sub>  | 7.838  | JSD D <sub>2d</sub>    | 30.42  |
| HH C <sub>2v</sub>     | 10.723 | TT T <sub>d</sub>      | 30.029 |
| MFF C <sub>s</sub>     | 2.49   | ETBPY T <sub>d</sub>   | 29.803 |

Abbreviations: EP – Enneagon, OPY – Octagonal pyramid, HBPY – Heptagonal bipyramid, JTC – Johnson triangular cupola J3, JCCU – Capped cube J8, CCU – Spherical-relaxed capped cube, JCSAPR – Capped square antiprism J10, CSAPR – Spherical capped square antiprism, JTCTPR – Tricapped trigonal prism J51, TCTPR – Spherical tricapped trigonal prism, JTDIC – Tridiminished icosahedron J63, HH – Hula-hoop, MFF – Muffin, OP – Octagon, HPY – Heptagonal pyramid, HBPY – Hexagonal bipyramid, CU – Cube, SAPR – Square antiprism, TDD – Triangular dodecahedron, JGBF – Johnson gyrobifastigium J26, JETBPY – Johnson elongated triangular bipyramid J14, JBTPR – Biaugmented trigonal prism J50, BTPR – Biaugmented trigonal prism JSD – Snub diphenoid J84, TT – Triakis tetrahedron, ETBPY – Elongated trigonal bipyramid.



**Table S4** The summary of the detection limits of Al<sup>3+</sup> by various fluorescent probes.

| Number | Probe                       | Detection limit / $\mu\text{M}$ |
|--------|-----------------------------|---------------------------------|
| 1      | BHMMP <sup>1</sup>          | 0.7                             |
| 2      | Tb-MOF <sup>2</sup>         | 6.10                            |
| 3      | QCT@ZIF-8 <sup>3</sup>      | 0.58                            |
| 4      | HL <sup>4</sup>             | 0.84                            |
| 5      | HPU-24@Ru <sup>5</sup>      | 11.63                           |
| 6      | Tb@MOF-808-TDA <sup>6</sup> | 0.08                            |
| 7      | MOF 1 <sup>7</sup>          | 2.90                            |
| 8      | This work                   | 0.53                            |

**Table S5** Double exponential function for [1+Al<sup>3+</sup>].

$$(A_1 \times t_1^2 + A_2 \times t_2^2) \div (A_1 \times t_1 + A_2 \times t_2)$$

|                       |         |
|-----------------------|---------|
| A <sub>1</sub>        | 469.36  |
| t <sub>1</sub>        | 1.94 ns |
| A <sub>2</sub>        | 127.95  |
| t <sub>2</sub>        | 4.62 ns |
| [1+Al <sup>3+</sup> ] | 2.99 ns |

## References

1. Z. Xing, J. Wang, J. Huang, X. Chen, Z. Zong, C. Fan and G. Huang, *Molecules*, 2022, **27**, 2569-2583.
2. X. Jing, J. Liu, M. Guo, G. Chen, G. Ren, J. Li, H. Qin, Z. Yao, Y. Wan, W. Song, H. Zeng, F. Yang, D. Zhao and K. Hu, *New J. Chem.*, 2023, **47**, 13619–13626.
3. T. Zhong, F. Sun, Z. Zhang and G. Wang, *J. Photoch. Photobio. A: Chem.*, 2023, **440**, 114677-114682.
4. G. C. Das, A. Kumar Das, D. Das, T. Raj Maity, A. Samanta, F. Ali Alasmery, A. Salem Almalki, A. Iqbal and M. Dolai, *J. Photoch. Photobio. A: Chem.*, 2023, **440**, 114663-114672.
5. H. Li, Y. Wang, F. Jiang, M. Li and Z. Xu, *Dalton Trans.*, 2023, **52**, 3846-3854.
6. D. Mei and B. Yan, *ACS. Appl. Mater. Interfaces*, 2023, **15**, 16882-16894.
7. X.-C. Huang, Y.-X. Jiang, Z.-J. Han, W. Yong, Q.-X. Huang, W.-X. Shi, X.-R. Chen, J.-J. Kong and H. Wu, *J. Mol. Struct.*, 2023, **1289** 135897-135905.
